# Supplementary material for: DOTAP-functionalized DNA nanocages enable efficient miR168d trafficking to antagonize PVY infection by modulating HSP90-5 homeostasis
Source: Research Square preprint supplement (doi:10.21203/rs.3.rs-7756582/v1), 2025-11-01
Supplement: Supplementary file 1 [file 9ca7481b3fb858cd9d664c88.xlsx]

## Sheet: S1.Table
S1 Table. Primers used in this study.
Primer	sequence	Purpose
β-Actin-F	CAAGGAAATCACCGCTTTGG	To analyze RNA expression level of Actin by qPCR
β-Actin-R	AAGGGATGCGAGGATGGA
miR168d-F	GGGGACAUCCGAUAAAAUUG	To analyze RNA expression level of miR168d by qPCR
miR168d-R	GGACCAUUUCUCGAUUUGUG
HSP90-5-F	ATCAGCAAGCACAATGACGA	To analyze RNA expression level of HSP90-5 by qPCR
HSP90-5-R	TCTAATTTCAGTTCCACGACCA
PVY CP-F	GATGAATGGGCTTATGGTTTGGTG	To analyze RNA expression level of PVY-N by qPCR
PVY CP-R	GATTTGCCTAAGGGTTGGTTTCG
A	TACACGCATCCTTAGGCCTGGAGATACATGCACATTACGGCTTTCCCTATTAGAAGGTCTCAGGTGCGCGTTTCGGTAAGTAGACGGGACCAGTTCGCC	Nucleic acid sequences constituting the four strands of TDN and miRNA, the red part is the linker DNA nucleic acid sequence.
A-Cy3	GCCTGGAGATACATGCACATTACGGCTTTCCCTATTAGAAGGTCTCAGGTGCGCGTTTCGGTAAGTAGACGGGACCAGTTCGCC-Cy3
B	CGCGCACCTGAGACCTTCTAATAGGGTTTGCGACAGTCGTTCAACTAGAATGCCCTTTGGGCTGTTCCGGGTGTGGCTCGTCGG
C	GGCCGAGGACTCCTGCTCCGCTGCGGTTTGGCGAACTGGTCCCGTCTACTTACCGTTTCCGACGAGCCACACCCGGAACAGCCC
D	GCCGTAATGTGCATGTATCTCCAGGCTTTCCGCAGCGGAGCAGGAGTCCTCGGCCTTTGGGCATTCTAGTTGAACGACTGTCGC
miR168d	CUAAGGAUGCGUGUA UCGCUUGGUGCAGGUCGGGAA
Antisense-miR168d	UUCCCGACCUGCACCAAGCGA
